# Supplementary material for: Investigating EEG Markers of Responsiveness to Surgical Noxious Stimuli under Propofol Anaesthesia
Source: Research Square preprint supplement (doi:10.21203/rs.3.rs-8845708/v1), 2026-02-17
Supplement: Supplementary file 1 [file 0203fbd06f08c932516af4f1.docx]

# Appendix – Methods

**Title: Investigating EEG Markers of Responsiveness to Surgical Noxious Stimuli under Propofol Anaesthesia**

Vidushani Dhanawansa B.Sc. (Hons)1, Jamie Sleigh2, Amy Gaskell MBChB PhD2, Adeel Razi PhD3,4, Levin Kuhlmann PhD1

1Department of Data Science and AI, Faculty of IT, 3Monash Biomedical Imaging, 4School of Psychological Sciences and Turner Institute for Brain and Mental Health, Monash University, Clayton, VIC

2Department of Anaesthesia, Waikato Clinical Campus, University of Auckland, Hamilton, New Zealand

## Global coherence

The following steps briefly outline the computation of the global coherence1. The multitaper estimate of the cross spectrum between channel pairs, represented by *i* and *j*, is defined as,

where denotes the mean corrected Fourier transform of the current density estimate at electrode site of segment at a frequency of , and denotes the complex conjugate.

Thereafter, the Singular Value Decomposition (SVD) on the cross spectral matrix yields *N* eigenspectra .

The global coherence is the ratio between the largest eigenvalue , to the sum of the eigenvalues which signifies the total energy at frequency, .

## Weighted Symbolic Mutual Information (wSMI)

wSMI2 quantifies the joint probability between pairs of EEG channels transformed into discrete symbols of m time samples. For each event, a data window of 200ms pre and 3s post stimulus was extracted. The temporal resolution (τ) of the samples was varied between 2, 4 and 8 samples, corresponding to 8ms, 16ms, and 32ms at a 500 Hz sampling rate. The signals were low pass filtered following the guideline of 80Hz/τ to avoid aliasing. Following the computation of the probability of each symbol in each signal, the joint probabilities between channel pairs were extracted. The joint probability matrix was multiplied by binary weights to reduce spurious correlations between signals. The weight was set to zero for identical symbol pairs and opposite symbols (e.g. [3 1 2] and [1 3 2]), which could be generated via a common source, or opposite sides of a single dipole, respectively. Pre-stimulus wSMI values were used for baseline normalization. The computation is summarized as follows,

where, and represent all symbols of length m in channel signals and , is the joint probability of the co-occurrence of symbol in signal and symbol in signal . represents the weight matrix between symbols.

## References

1. Cimenser A, Purdon PL, Pierce ET, et al. Tracking brain states under general anesthesia by using global coherence analysis. *Proc Natl Acad Sci U S A*. May 24 2011;108(21):8832-7. doi:10.1073/pnas.1017041108

2. King JR, Sitt JD, Faugeras F, et al. Information sharing in the brain indexes consciousness in noncommunicative patients. *Curr Biol*. Oct 7 2013;23(19):1914-9. doi:10.1016/j.cub.2013.07.075
