# Supplementary material for: Investigating EEG Markers of Responsiveness to Surgical Noxious Stimuli under Propofol Anaesthesia
Source: Research Square preprint supplement (doi:10.21203/rs.3.rs-8845708/v1), 2026-02-17
Supplement: Supplementary file 2 [file 2295b0cb4ee89686a0548b46.docx]

# Supplemental Material

**Title: Investigating EEG Markers of Responsiveness to Surgical Noxious Stimuli under Propofol Anaesthesia**

Vidushani Dhanawansa B.Sc. (Hons)1, Jamie Sleigh2, Amy Gaskell MBChB PhD2, Adeel Razi PhD3,4, Levin Kuhlmann PhD1

1Department of Data Science and AI, Faculty of IT, 3Monash Biomedical Imaging, 4School of Psychological Sciences and Turner Institute for Brain and Mental Health, Monash University, Clayton, VIC

2Department of Anaesthesia, Waikato Clinical Campus, University of Auckland, Hamilton, New Zealand

This file includes:

Figures S1 to S3

Tables S1 to S2


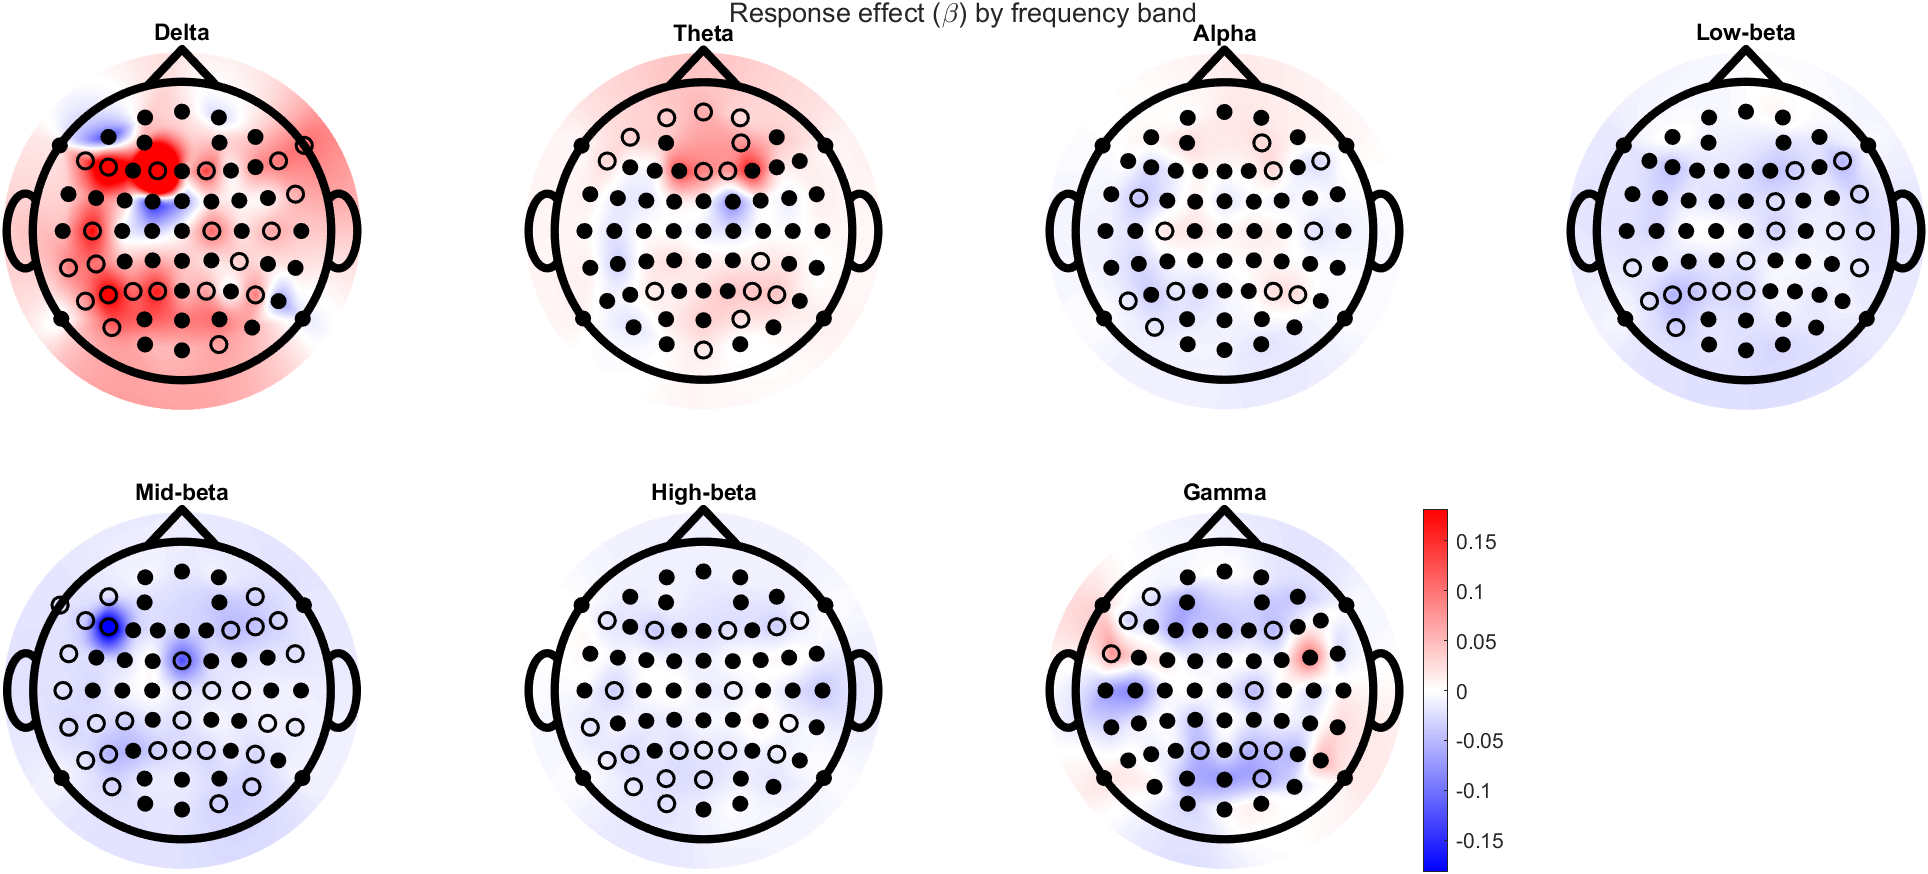


## Figure S: Topographic maps showing population response effect (β) by frequency band with common colour scale across all bands (unfilled channels: p < 0.05, corrected for multiple comparisons).


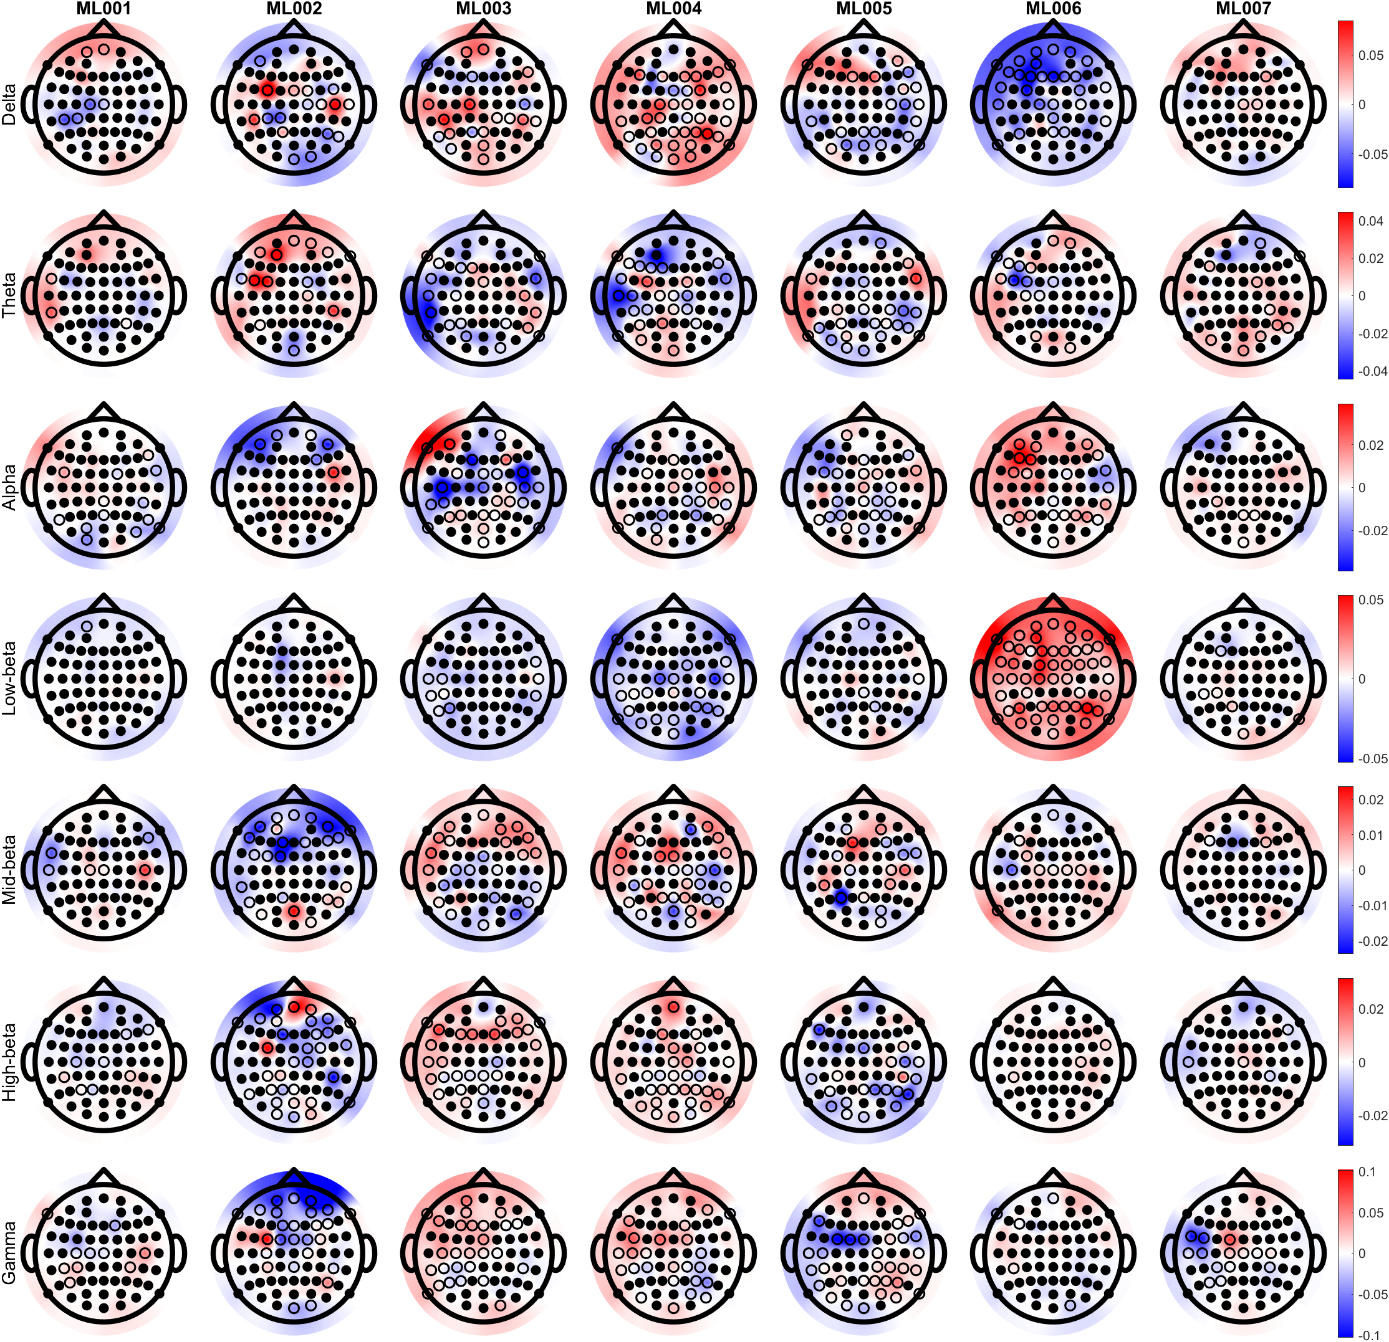


## Figure S: Topographic maps showing subject-specific noxious stimulation effect (β) with individual colour scales for each frequency band. Frequency bands span across 1-47 Hz (unfilled channels: p < 0.05, corrected for multiple comparisons).


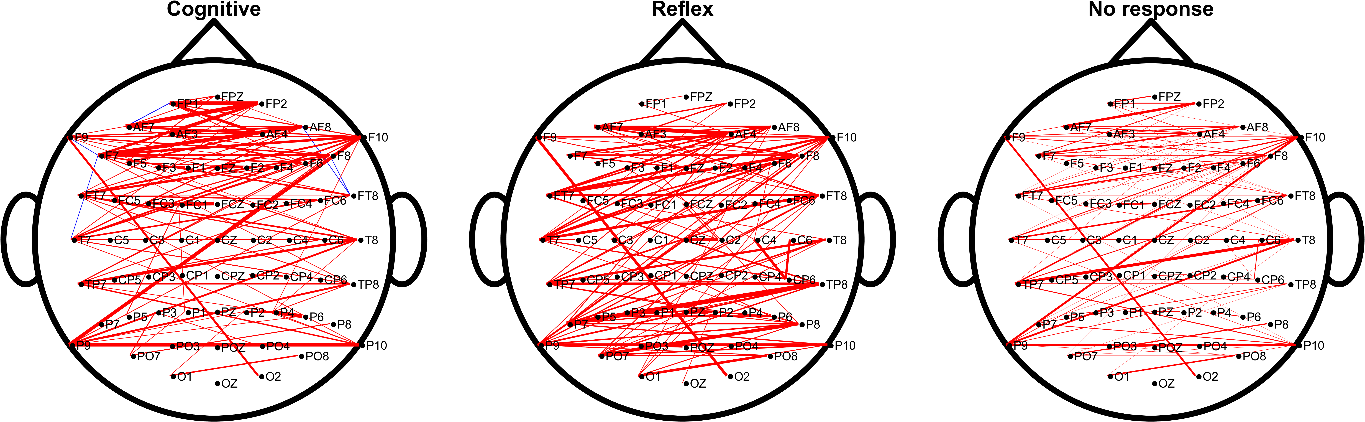


## Figure S: Group level figure for response categories showing top 95% connections (mean wSMI) between all channels. Red and blue connections indicate positive and negative baseline-corrected wSMI, respectively. The widths of the connections are proportional to the magnitude.

## Table S: p-values of non-parametric tests between desynchronization/ synchronization (ERD/ERS) of different response categories for identified channels of importance. Frequency bands span across 1-47 Hz (*p < 0.05, **p < 0.05 and survived multiple comparisons).

|  | **Cognitive vs Reflex** | | | | | | | **Cognitive vs No response** | | | | | | |
| --- | --- | --- | --- | --- | --- | --- | --- | --- | --- | --- | --- | --- | --- | --- |
|  | **Delta** | **Theta** | **Alpha** | **Low-beta** | **Mid-beta** | **High-beta** | **Gamma** | **Delta** | **Theta** | **Alpha** | **Low-beta** | **Mid-beta** | **High-beta** | **Gamma** |
| **C1** | 6.67E-01 | 3.33E-02 * | 1.17E-01 | 1.00E+00 | 2.67E-01 | 3.83E-01 | 1.83E-01 | 6.27E-01 | 5.85E-01 | 9.03E-01 | 8.08E-01 | 2.25E-01 | 1.45E-01 | 3.31E-01 |
| **C3** | 3.33E-02 * | 3.33E-02 * | 5.17E-01 | 6.67E-02 | 1.83E-01 | 1.67E-02 ** | 1.67E-02 ** | 8.91E-02 | 5.85E-01 | 2.49E-01 | 8.91E-02 | 3.62E-01 | 2.47E-02 * | 1.08E-02 * |
| **C5** | 1.83E-01 | 1.67E-02 ** | 1.83E-01 | 1.67E-02 ** | 6.67E-02 | 1.67E-02 ** | 1.67E-02 ** | 5.85E-01 | 5.98E-02 | 2.49E-01 | 1.29E-01 | 6.27E-01 | 5.98E-02 | 3.90E-02 * |
| **T7** | 1.67E-02 * | 1.17E-01 | 3.83E-01 | 3.33E-02 * | 1.67E-02 ** | 1.67E-02 ** | 1.67E-02 ** | 7.61E-01 | 5.44E-01 | 8.08E-01 | 4.30E-01 | 6.85E-02 | 1.08E-02 * | 1.52E-02 * |
| **C2** | 1.83E-01 | 1.00E+00 | 1.67E-02 ** | 1.83E-01 | 8.33E-01 | 2.67E-01 | 1.83E-01 | 1.63E-01 | 8.91E-02 | 9.52E-01 | 3.90E-02 * | 1.29E-01 | 1.29E-01 | 2.88E-02 * |
| **C4** | 3.83E-01 | 6.67E-01 | 1.67E-02 ** | 1.17E-01 | 1.00E+00 | 1.17E-01 | 6.67E-01 | 3.95E-01 | 5.85E-01 | 8.91E-02 | 6.27E-01 | 3.95E-01 | 9.03E-01 | 1.00E+00 |
| **C6** | 8.33E-01 | 2.67E-01 | 3.83E-01 | 3.83E-01 | 3.33E-02 * | 1.67E-02 ** | 1.67E-02 ** | 4.30E-01 | 2.02E-01 | 2.74E-01 | 2.49E-01 | 2.74E-01 | 1.82E-01 | 1.52E-02 * |
| **T8** | 1.83E-01 | 3.33E-02 * | 1.00E+00 | 5.17E-01 | 1.17E-01 | 3.33E-02 * | 1.83E-01 | 9.03E-01 | 3.95E-01 | 5.04E-01 | 7.61E-01 | 6.71E-01 | 2.49E-01 | 5.20E-02 |
| **TP7** | 6.67E-02 | 1.67E-02 ** | 2.67E-01 | 2.67E-01 | 1.67E-02 ** | 1.67E-02 ** | 1.67E-02 ** | 6.27E-01 | 5.04E-01 | 2.02E-01 | 8.08E-01 | 6.27E-01 | 2.47E-02 * | 2.10E-02 * |

|  | **Reflex vs No response** | | | | | | |
| --- | --- | --- | --- | --- | --- | --- | --- |
|  | **Delta** | **Theta** | **Alpha** | **Low-beta** | **Mid-beta** | **High-beta** | **Gamma** |
| **C1** | 1.00E+00 | 2.39E-02 * | 5.98E-03 * | 3.09E-01 | 6.24E-01 | 1.00E+00 | 2.43E-01 |
| **C3** | 2.28E-01 | 1.44E-02 * | 2.16E-02 * | 8.21E-01 | 1.14E-01 | 4.51E-01 | 4.29E-01 |
| **C5** | 4.21E-03 ** | 3.74E-03 ** | 5.47E-01 | 7.68E-02 | 2.39E-02 * | 1.04E-02 * | 9.76E-02 |
| **T7** | 3.74E-03 ** | 3.18E-02 * | 5.98E-01 | 1.42E-01 | 4.62E-04 ** | 1.56E-03 ** | 4.20E-02 * |
| **C2** | 5.72E-01 | 3.74E-03 ** | 7.51E-03 * | 7.63E-01 | 5.48E-02 | 6.24E-01 | 3.50E-02 * |
| **C4** | 7.07E-01 | 8.32E-02 | 1.42E-01 | 1.32E-01 | 8.32E-02 | 1.23E-01 | 6.24E-01 |
| **C6** | 3.66E-01 | 9.40E-01 | 6.24E-01 | 9.40E-01 | 7.68E-02 | 1.23E-01 | 7.35E-01 |
| **T8** | 5.97E-02 | 5.02E-02 | 6.24E-01 | 2.59E-01 | 2.63E-02 * | 2.39E-02 * | 6.79E-01 |
| **TP7** | 1.16E-02 * | 2.02E-03 ** | 6.51E-01 | 4.60E-02 * | 1.37E-03 ** | 9.02E-02 | 4.51E-01 |

## Table S: Differences of median wSMI between response categories, for specified regions pairs and temporal resolutions (τ) (* indicates p<0.05 with non-parametric testing).

| **τ** | **Region pair** | **Cognitive vs Reflex** | **Cognitive vs No response** | **Reflex vs No response** |
| --- | --- | --- | --- | --- |
| 2 | Frontal - parietal | 3.73E-03 | 1.43E-03 | -2.30E-03 |
| Frontal - occipital | 3.93E-03 | *3.97E-03 ** | 3.72E-05 |
| 4 | Frontal - parietal | 4.83E-03 | 2.21E-03 | *-2.62E-03 ** |
| Frontal - occipital | 1.36E-03 | 5.26E-04 | -8.37E-04 |
| 8 | Frontal - parietal | 3.17E-03 | -2.71E-03 | *-5.88E-03 ** |
| Frontal - occipital | 8.96E-04 | 3.96E-03 | 3.07E-03 |
